# Supplementary material for: Role for intravesical prostatic protrusion in lower urinary tract symptom: a fluid structural interaction analysis study
Source: Springer Nature journal article supplement (doi:10.1186/s12894-015-0081-y), 2015-08-18
Supplement: MOESM3 [file 9753622]

Table 1 in supplement data  
 Reynold numbers( $Re = \rho v d / \eta$ )

| model number | hydraulic diameter(mm) | average flow velocity(m/s) | Reynold numbers |
|--------------|------------------------|----------------------------|-----------------|
| 1            | 1                      | 11.3                       | 12671.23596     |
|              | 1.5                    | 6.7                        | 11269.55056     |
|              | 2                      | 5.4                        | 12110.5618      |
|              | 3                      | 3.4                        | 11437.75281     |
|              | 4                      | 1.9                        | 8522.247191     |
| 2            | 1                      | 8.8                        | 9867.865169     |
|              | 1.5                    | 5.6                        | 9419.325843     |
|              | 2                      | 4.5                        | 10092.13483     |
|              | 3                      | 3                          | 10092.13483     |
|              | 4                      | 1.8                        | 8073.707865     |
| 3            | 1                      | 8.4                        | 9419.325843     |
|              | 1.5                    | 5.6                        | 9419.325843     |
|              | 2                      | 4.6                        | 10316.40449     |
|              | 3                      | 3.1                        | 10428.53933     |
|              | 4                      | 1.8                        | 8073.707865     |
| 4            | 1                      | 11.1                       | 12446.96629     |
|              | 1.5                    | 6.6                        | 11101.34831     |
|              | 2                      | 5.2                        | 11662.02247     |
|              | 3                      | 3.3                        | 11101.34831     |
|              | 4                      | 1.9                        | 8522.247191     |
| 5            | 1                      | 6.3                        | 7064.494382     |
|              | 1.5                    | 4.4                        | 7400.898876     |
|              | 2                      | 4.1                        | 9195.05618      |
|              | 3                      | 2.7                        | 9082.921348     |
|              | 4                      | 1.6                        | 7176.629213     |
| 6            | 1                      | 12.4                       | 13904.7191      |
|              | 1.5                    | 7.1                        | 11942.35955     |
|              | 2                      | 5.7                        | 12783.37079     |
|              | 3                      | 3.5                        | 11774.1573      |
|              | 4                      | 2.1                        | 9419.325843     |
| 7            | 1                      | 9.2                        | 10316.40449     |
|              | 1.5                    | 6.2                        | 10428.53933     |
|              | 2                      | 4.8                        | 10764.94382     |
|              | 3                      | 3.1                        | 10428.53933     |
|              | 4                      | 1.9                        | 8522.247191     |
| 8            | 1                      | 8.8                        | 9867.865169     |
|              | 1.5                    | 5.6                        | 9419.325843     |
|              | 2                      | 4.5                        | 10092.13483     |
|              | 3                      | 3                          | 10092.13483     |
|              | 4                      | 1.8                        | 8073.707865     |
| 9            | 1                      | 8.6                        | 9643.595506     |
|              | 1.5                    | 5.1                        | 8578.314607     |
|              | 2                      | 4.7                        | 10540.67416     |
|              | 3                      | 3.1                        | 10428.53933     |
|              | 4                      | 1.8                        | 8073.707865     |
| 10           | 1                      | 7.1                        | 7961.573034     |
|              | 1.5                    | 5.1                        | 8578.314607     |
|              | 2                      | 4.3                        | 9643.595506     |
|              | 3                      | 3                          | 10092.13483     |
|              | 4                      | 1.7                        | 7625.168539     |
| minimal      |                        |                            | 7064.494382     |
| maximal      |                        |                            | 13904.7191      |
