# Supplementary material for: Role for intravesical prostatic protrusion in lower urinary tract symptom: a fluid structural interaction analysis study
Source: Springer Nature journal article supplement (doi:10.1186/s12894-015-0081-y), 2015-08-18
Supplement: MOESM4 [file 9753622]

**Table 2 in supplement data**  
**Result for pressure flow studies**

| pt number | max flow rate(ml) | Pves at maximal flow rate(cmH2O) | Pdet at maximal flow rate(cmH2O) | voided volume(ml) |
|-----------|-------------------|----------------------------------|----------------------------------|-------------------|
| 1         | 11                | 110                              | 54                               | 207               |
| 2         | 9                 | 105                              | 70                               | 182               |
| 3         | 9                 | 95                               | 45                               | 245               |
| 4         | 11                | 115                              | 64                               | 214               |
| 5         | 7                 | 98                               | 56                               | 164               |
| 6         | 12                | 104                              | 69                               | 177               |
| 7         | 10                | 101                              | 53                               | 153               |
| 8         | 9                 | 113                              | 56                               | 168               |
| 9         | 9                 | 89                               | 58                               | 195               |
| 10        | 8                 | 95                               | 42                               | 180               |
| average   | 9.5               | 102.5                            | 56.7                             | 188.5             |
| minimal   | 7                 | 89                               | 42                               | 153               |
| maximal   | 12                | 115                              | 70                               | 245               |
